# Supplementary material
Source: publisher site journal article supplement (https://kjim.org/upload/media/kjim-2024-041-Supplementary-Table-3.pdf)
Supplement: Supplementary file 1 [file kjim-2024-041-Supplementary-Table-3.pdf]

**Supplementary Table 3. Univariate and multivariate analysis of factors for overall response rate of first-line chemotherapy**

| Characteristic                      | Univariate analysis |                | Multivariate analysis |                |
|-------------------------------------|---------------------|----------------|-----------------------|----------------|
|                                     | OR (95% CI)         | <i>p</i> value | OR (95% CI)           | <i>p</i> value |
| Age ≥ 84 yr                         | 1.95 (0.75–5.08)    | 0.169          |                       |                |
| Sex, female                         | 1.17 (0.49–2.74)    | 0.724          |                       |                |
| ECOG PS > 2                         | 2.14 (0.83–5.55)    | 0.116          |                       |                |
| CCI > 4                             | 1.02 (0.40–2.56)    | 0.973          |                       |                |
| ISS III                             | 1.14 (0.46–2.85)    | 0.775          |                       |                |
| R-ISS III                           | 1.43 (0.56–3.63)    | 0.454          |                       |                |
| Hemoglobin < 10 g/dL                | 1.69 (0.62–4.61)    | 0.301          |                       |                |
| Bone disease                        | 2.86 (1.09–7.53)    | 0.033          | 2.93 (0.88–9.73)      | 0.079          |
| Calcium > 11 mg/dL                  | 2.65 (0.27–26.57)   | 0.407          |                       |                |
| Creatinine > 2 mg/dL                | 1.61 (0.57–4.61)    | 0.372          |                       |                |
| Platelet < 100 × 10 <sup>9</sup> /L | 1.43 (0.49–4.14)    | 0.515          |                       |                |
| Albumin < 3.5 g/dL                  | 1.59 (0.65–3.89)    | 0.310          |                       |                |
| LDH elevation                       | 1.64 (0.68–3.92)    | 0.269          |                       |                |
| High-risk cytogenetic abnormalities | 3.47 (1.09–11.05)   | 0.036          | 2.59 (0.75–8.94)      | 0.132          |
| 1st chemotherapy                    |                     | 0.113          |                       |                |
| Bortezomib-based                    | 1                   |                |                       |                |
| Lenalidomide-base                   | 2.41 (0.89–6.53)    |                |                       |                |
| Alkylating agent-based              | 2.76 (0.86–8.80)    |                |                       |                |

OR, odds ratio; CI, confidence interval; ECOG PS, Eastern Cooperative Oncology Group Performance Status; CCI, Charlson comorbidity index; ISS, International Staging System; R-ISS, Revised International Staging System; LDH, lactate dehydrogenase.
